# Supplementary material
Source: publisher figshare collection journal article supplement (https://acs.figshare.com/ndownloader/files/3599658)
Supplement: Supplementary file 1 [file 3599658]

# Solid-State Mesostructured Perovskite $\text{CH}_3\text{NH}_3\text{PbI}_3$ Solar Cells: Charge Transport, Recombination, and Diffusion Length

Yixin Zhao, Alexandre M. Nardes, and Kai Zhu\*

*Chemical and Materials Science Center, National Renewable Energy Laboratory, Golden, Colorado 80401*

## Experimental Method

**Transparent conducting substrate.** Fluorine-doped transparent conducting  $\text{SnO}_2$ -coated glass substrate (FTO; TEC15, Hartford, USA) was pre-patterned by etching with Zn powder and 25 wt% HCl solution for about two min. The patterned FTO substrate was then cleaned by soaking in 5 wt% NaOH in alcohol for 16 h and then rinsing it sequentially with deionized (DI) water and ethanol. The cleaned FTO substrate was subsequently coated with a compact  $\text{TiO}_2$  layer by spray pyrolysis using 0.2 M Ti(IV) bis(ethyl acetoacetate)-diisopropoxide in 1-butanol solution at  $450^\circ\text{C}$ , followed by annealing at  $450^\circ\text{C}$  for 1 h.<sup>1</sup>

**Mesoporous  $\text{TiO}_2$  film.** The 20-nm-sized  $\text{TiO}_2$  nanoparticles were synthesized by following previous reports.<sup>2-3</sup> Various  $\text{TiO}_2$  pastes with different weight percentages (3–18 wt%) of the 20-nm  $\text{TiO}_2$  nanoparticles mixed with terpineol and ethyl cellulose were screen-printed on the patterned FTO substrates to produce  $\text{TiO}_2$  films with average film thickness ranging from 240–1650 nm. The thickness is controlled by using  $\text{TiO}_2$  paste with different weight percentage of  $\text{TiO}_2$  nanoparticles. The emulsion thicknesses of the screens were also adjusted. The printed mesoporous  $\text{TiO}_2$  film was annealed at  $500^\circ\text{C}$  for 0.5 h. The  $\text{TiO}_2$  films were then soaked in 0.04 M  $\text{TiCl}_4$  solution at  $65^\circ\text{C}$  for 0.5 h, followed by rinsing with DI water and ethanol, and finally dried under  $\text{N}_2$ . These  $\text{TiCl}_4$ -treated  $\text{TiO}_2$  films were annealed again at  $500^\circ\text{C}$  for 0.5 h before the deposition of perovskite  $\text{CH}_3\text{NH}_3\text{PbI}_3$  absorber or uptake of Z907 dye molecules.

**Device fabrication.** For perovskite solar cells, the perovskite  $\text{CH}_3\text{NH}_3\text{PbI}_3$  coating was done by spin coating as detailed in our previous report.<sup>4</sup> In brief, the perovskite  $\text{CH}_3\text{NH}_3\text{PbI}_3$  was deposited on the mesoporous  $\text{TiO}_2$  film by spin coating with a stoichiometric  $\text{CH}_3\text{NH}_3\text{I}$  and  $\text{PbI}_2$  solution in  $\gamma$ -butyrolactone.  $\text{CH}_3\text{NH}_3\text{I}$  was synthesized by reacting methylamine (33 wt% ethanol solution) and hydroiodic acid (57 wt% in water, Aldrich) with the molar ratio of 1.2:1 in an ice bath for 2 h with stirring. The precipitate was first dried by a rotary evaporator, followed by repeated washing and centrifuging with ethyl acetate until no yellow residue remains, and finally dried under vacuum. 1.157 g  $\text{PbI}_2$  and 0.395 g  $\text{CH}_3\text{NH}_3\text{I}$  were dissolved in 2.0 mL  $\gamma$ -butyrolactone solution at  $60^\circ\text{C}$ . The clear

perovskite precursor solution was first spread on the TiO<sub>2</sub> substrate for 5 s and then was spun at 2000 rpm for 30 s in ambient condition. The deposited CH<sub>3</sub>NH<sub>3</sub>PbI<sub>3</sub> film was finally dried on a hotplate at 100°C for 5 min. For dye-sensitized solar cells, the TiO<sub>2</sub> films were immersed in *tert*-butyl alcohol/acetonitrile (1:1, v/v) containing 0.3 mM Ru(4,4'-dicarboxylic acid-2,2'-bipyridine)(4,4'-dinonyl-2,2'-bipyridine)(NCS)<sub>2</sub> (Z907) for 16 h at room temperature.

For both perovskite solar cells and dye-sensitized solar cells, a hole transport material (HTM) solution was spin-coated on the sensitized TiO<sub>2</sub> electrodes at 4000 rpm for 30 s. The HTM solution consists of 0.15 M 2,2',7,7'-tetrakis-(*N,N*-di-*p*-methoxyphenyl-amine)-9,9'-spirobifluorene (spiro-MeOTAD), 0.05 M bis(trifluoromethane)sulfonimide lithium salt (Li-TFSi), and 0.18 M 4-*tert*-butylpyridine (tBP) in chlorobenzene/acetonitrile (10:1, v/v) solution. Finally, a 150-nm-thick Ag layer was deposited on the HTM layer by thermal evaporation. The active area of each device was about 0.15–0.28 cm<sup>2</sup>.

**Characterization.** The crystal structures of the perovskite films were measured by X-ray diffraction (XRD, Rigaku D/Max 2200 diffractometer with Cu K<sub>α</sub> radiation). The absorption spectra of the perovskite films were characterized by an UV/Vis-NIR spectrophotometer (Cary-6000i). The photocurrent–voltage characteristic of solid-state mesostructured perovskite cells and dye-sensitized solar cells were measured with a Keithley 2400 source meter under the simulated AM 1.5G illumination (100 mW/cm<sup>2</sup>; Oriel Sol3A Class AAA Solar Simulator). The performance data of perovskite solar cells are representative from 12–20 cells (unless otherwise stated) for each TiO<sub>2</sub> film thickness. Charge transport and recombination properties of the perovskite sensitized cells were measured by intensity-modulated photocurrent and photovoltage spectroscopies as described previously.<sup>5</sup>

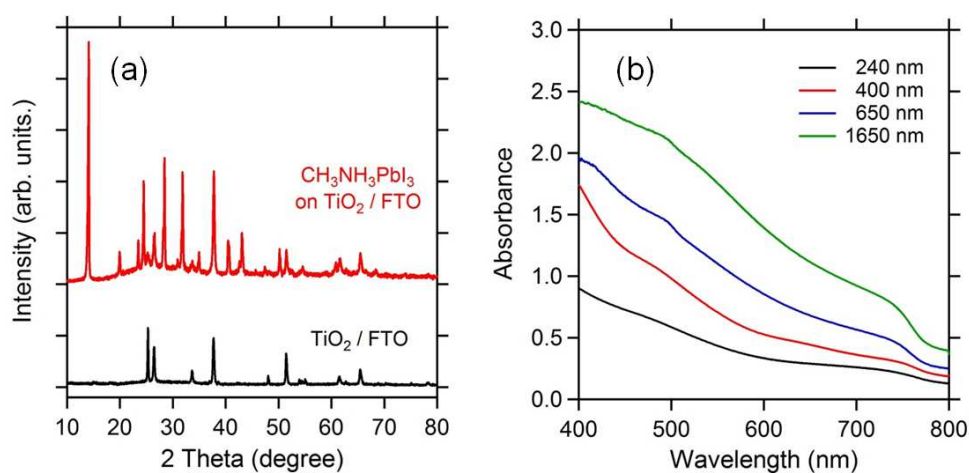

**Figure S1.** (a) X-ray diffraction patterns of the TiO<sub>2</sub>/FTO substrate and perovskite CH<sub>3</sub>NH<sub>3</sub>PbI<sub>3</sub> deposited on the TiO<sub>2</sub>/FTO substrate. (b) UV-vis absorption spectra of perovskite CH<sub>3</sub>NH<sub>3</sub>PbI<sub>3</sub> as a function of TiO<sub>2</sub> film thickness.

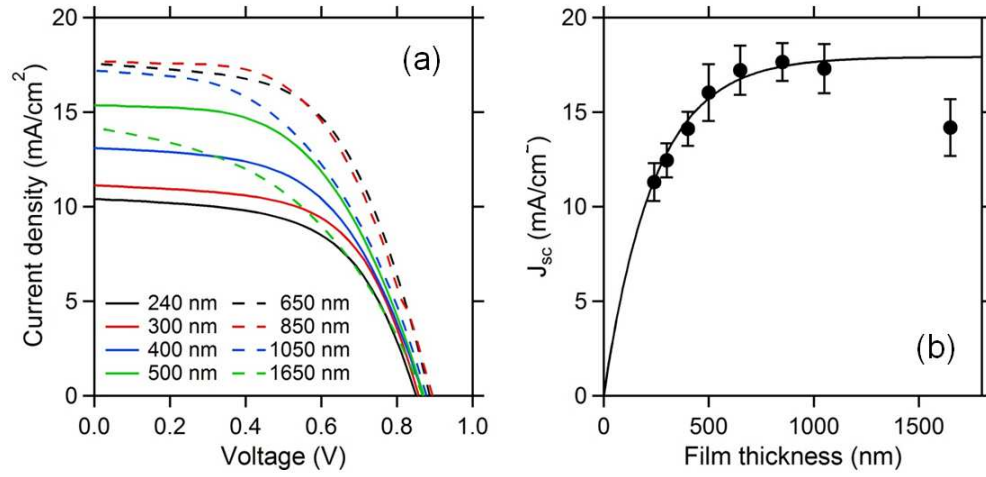

**Figure S2.** (a) Effect of TiO<sub>2</sub> film thickness on the  $J$ - $V$  curves of mesostructured perovskite CH<sub>3</sub>NH<sub>3</sub>PbI<sub>3</sub> solar cells. (b) Dependence of  $J_{sc}$  on the TiO<sub>2</sub> film thickness. The error bars represent the measurements from 12–20 cells. The solid line in (b) is a fitting to a simple model  $J_{sc} \propto 1 - \exp(-\alpha d)$  assuming constant charge-collection efficiency for all thickness ( $d$ ) and an effective absorption coefficient ( $\alpha$ ). This simple model fits well for all samples except for the one with the thickest TiO<sub>2</sub> film (1.65  $\mu$ m). The effective absorption length ( $1/\alpha$ ) from the fitting is about 250 nm.

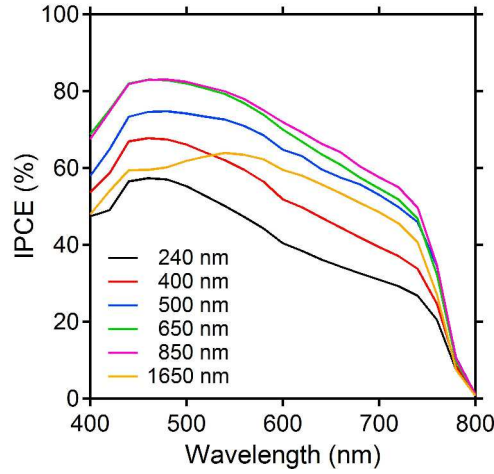

**Figure S3.** Effect of TiO<sub>2</sub> film thickness on the IPCE spectra of mesostructured perovskite CH<sub>3</sub>NH<sub>3</sub>PbI<sub>3</sub> solar cells.

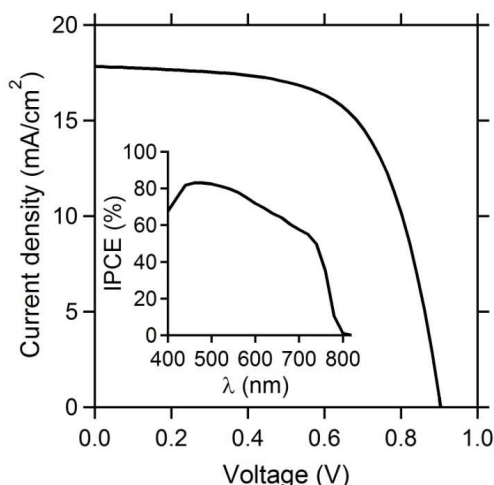

**Figure S4.**  $J$ - $V$  and IPCE curves of an optimized solid-state mesostructured perovskite  $\text{CH}_3\text{NH}_3\text{PbI}_3$  solar cell using a 650-nm  $\text{TiO}_2$  film. The cell efficiency is 10.3% with a  $J_{\text{sc}}$  of 17.8  $\text{mA}/\text{cm}^2$ ,  $V_{\text{oc}}$  of 0.90 V, and FF of 0.64.

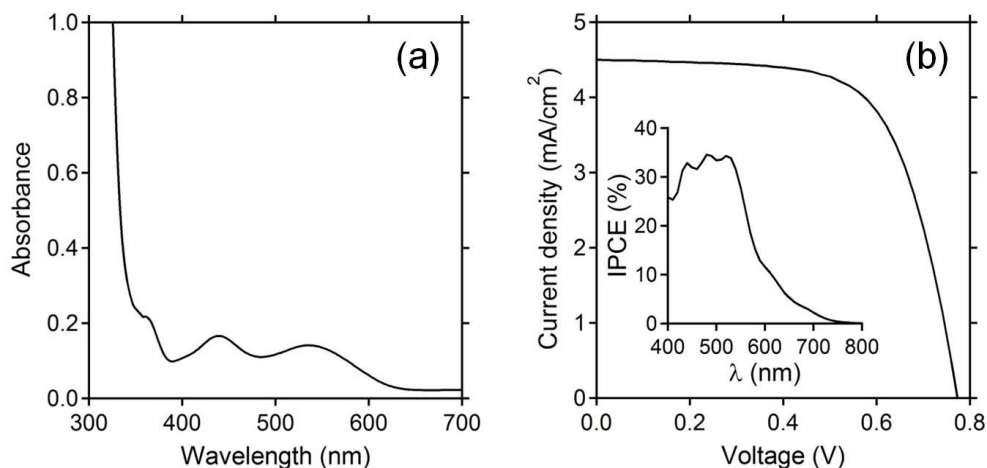

**Figure S5.** (a) UV-vis absorption spectrum and (b)  $J$ - $V$  (inset: IPCE) of solid-state Z907 dye-sensitized solar cells using 650-nm-thick  $\text{TiO}_2$  films.

## REFERENCES

- (1). Jang, S. R.; Zhu, K.; Ko, M. J.; Kim, K.; Kim, C.; Park, N. G.; Frank, A. J. Voltage-enhancement mechanisms of an organic dye in high open-circuit voltage solid-state dye-sensitized solar cells. *ACS Nano* **2011**, 5, 8267–8274.
- (2). Neale, N. R.; Frank, A. J. Size and shape control of nanocrystallites in mesoporous  $\text{TiO}_2$  films. *J. Mater. Chem.* **2007**, 17, 3216–3221.
- (3). Ito, S.; Murakami, T. N.; Comte, P.; Liska, P.; Gratzel, C.; Nazeeruddin, M. K.; Gratzel, M. Fabrication of thin film dye sensitized solar cells with solar to electric power conversion efficiency over 10%. *Thin Solid Films* **2008**, 516, 4613–4619.
- (4). Zhao, Y.; Zhu, K. Charge transport and recombination in perovskite  $(\text{CH}_3\text{NH}_3)\text{PbI}_3$  sensitized  $\text{TiO}_2$  solar cells. *J. Phys. Chem. Lett.* **2013**, 4, 2880–2884.
- (5). Zhu, K.; Kopidakis, N.; Neale, N. R.; van de Lagemaat, J.; Frank, A. J. Influence of surface area on charge transport and recombination in dye-sensitized  $\text{TiO}_2$  solar cells. *J. Phys. Chem. B* **2006**, 110, 25174–25180.
